# Supplementary material for: Nanomechanical clues from morphologically normal cervical squamous cells could improve cervical cancer screening
Source: Royal Society of Chemistry journal article supplement (doi:10.1039/c5nr03662c), 2015-01-01
Supplement: c5nr03662c1.pdf [file c5nr03662c1.pdf]

## Nanomechanical Clues from Morphologically Normal Cervical

### Squamous Cells could improve cervical Cancer Screening

Li Geng<sup>#</sup>, Jiantao Feng<sup>#</sup>, Quanmei Sun, Jing Liu, Wenda Hua, Jing Li, Zhuo Ao, Ke You, Yanli Guo, Fulong Liao, Youyi Zhang, Hongyan Guo, Jinsong Han, Guangwu Xiong, Lufang Zhang, Dong Han\*

\* Correspondence to: dhan@nanoctr.cn

<sup>#</sup> These authors contributed equally to this work.

## Supplementary information

### Supplementary Discussion

#### *Risks associated with needle-track metastases*

In general, conducting a biopsy directly in lesion tissues, especially when modern imaging techniques can be used, is the gold standard for the diagnosis of tissue lesion. However, various side-effects and complications must be considered. For example, there are often differences in the guidelines from European and American specialists for performing biopsies on the same tumors.<sup>[1]</sup> Needle track seeding or implantation of tumor cells during a biopsy, the most undesirable of all the complications, is a possibility. Large-scale randomized multi-center clinical trials have not been conducted recently to determine the precise incidence rate of biopsy-induced tumor seeding or its risk factors for different tumors. It is known, however, that the incidence of biopsy-induced tumor seeding varies depending on tumor type, and may be correlated with both the malignancy stage of the tumor and biopsy method. <sup>[2-10]</sup> Jenssen *et al* recently reviewed data on the complications and risk factors of endoscopic ultrasonography (EUS)-guided fine-needle biopsy (FNB).<sup>[2]</sup> Needle-track seeding is a rare complication following FNB of intra-abdominal tumors. Based on large retrospective surveys, its frequency is estimated to be 0.003% to 0.009%. However, one prospective comparative study reported that the incidence of needle-track implantation of hepatocellular carcinoma and pancreatic carcinoma after ultrasound-guided percutaneous puncture was 1.5%. A systematic review and a meta-analysis of percutaneous biopsy of HCC reported tumor seeding frequencies was 2.29% and 2.7%, respectively. After percutaneous biopsy of colorectal cancer liver metastases, the risk of needle-track metastases seems to be even higher, occurring in 10% to 19% of cases.<sup>[3-6]</sup> Loughran *et al* reviewed evidence regarding needle biopsy of the breast and the potential for seeding tumor cells into adjacent tissues following the

procedure.<sup>[7]</sup> They suggested that the seeding of tumor cells during needle biopsies must be a possibility and that, while it was difficult to determine its incidence rate from related clinical studies due to heterogenic clinical data, its incidence rate was likely related to biopsy method and tumor type. <sup>[7]</sup> The probability of tumor metastasis via the blood or sentinel lymph nodes was also discussed. <sup>[8-10]</sup> For the above reasons, it is clearly advisable to avoid touching tumors directly while assessing their degree of malignancy.

Our research propose that it might be possible to avoid the risk of needle-track metastases, such as colorectal cancer liver metastases that are usually caused by biopsy sampling of tumor tissues if the sampling process is performed directly to doubtful lesions. We therefore concentrated on the morphologically normal cervical squamous cells from clinic cervical cancer screening, which are spatially adjacent to lesion tissue. The cervix is classified as a fully exposed organ of the human body. We obtained cell samples by colposcopy, and could thus visually confirm the exact position from which cells were sampled. In addition, it has been shown that microenvironments consisting of parenchymal and interstitial cells, and the extracellular matrix around tumors, play important roles in tumor spread and metastasis. <sup>[11-13]</sup>

## References:

- 1 Bruix, J. & Sherman, M. Management of hepatocellular carcinoma: an update. *Hepatology* **53**, 1020-1022 (2011).
- 2 Jenssen, C., Alvarez-Sánchez, M. V., Napoléon, B. & Faiss, S. Diagnostic endoscopic ultrasonography: Assessment of safety and prevention of complications. *World journal of gastroenterology: WJG* **18**, 4659 (2012).
- 3 Kosugi, C. *et al.* Needle tract implantation of hepatocellular carcinoma and pancreatic carcinoma after ultrasound-guided percutaneous puncture: clinical and pathologic characteristics and the treatment of needle tract implantation. *World journal of surgery* **28**, 29-32 (2004).
- 4 Stigliano, R. *et al.* Seeding following percutaneous diagnostic and therapeutic approaches for hepatocellular carcinoma. What is the risk and the outcome?: Seeding risk for percutaneous approach of HCC. *Cancer treatment reviews* **33**, 437-447 (2007).
- 5 Silva, M. A. *et al.* Needle track seeding following biopsy of liver lesions in the diagnosis of hepatocellular cancer: a systematic review and meta-analysis. *Gut* **57**, 1592-1596 (2008).
- 6 Dietrich, C. F. & Albrecht, T. *Interventioneller Ultraschall: Lehrbuch und Atlas für die interventionelle Sonographie.* (Thieme, 2011).
- 7 Loughran, C. & Keeling, C. Seeding of tumour cells following breast biopsy: a literature review. *British Journal of Radiology* **84**, 869-874 (2011).
- 8 Hansen, N. M., Ye, X., Grube, B. J. & Giuliano, A. E. Manipulation of the primary breast tumor and the incidence of sentinel node metastases from invasive breast cancer. *Archives of*

- Surgery* **139**, 634 (2004).
- 9 Peters-Engl, C. *et al.* The impact of preoperative breast biopsy on the risk of sentinel lymph node metastases: analysis of 2502 cases from the Austrian Sentinel Node Biopsy Study Group. *British journal of cancer* **91**, 1782-1786 (2004).
- 10 Hu, X. & Chow, L. W. Fine needle aspiration may shed breast cells into peripheral blood as determined by RT-PCR. *Oncology* **59**, 217-222 (2000).
- 11 Butcher, D. T., Alliston, T. & Weaver, V. M. A tense situation: forcing tumour progression. *Nature Reviews Cancer* **9**, 108-122 (2009).
- 12 Lopez, J., Mouw, J. & Weaver, V. Biomechanical regulation of cell orientation and fate. *Oncogene* **27**, 6981-6993 (2008).
- 13 Jaalouk, D. E. & Lammerding, J. Mechanotransduction gone awry. *Nature reviews Molecular cell biology* **10**, 63-73 (2009).

## Supplementary tables and figures

|                    | control | CIN 1 | CIN 2 | CIN 3 | Cervical cancer |
|--------------------|---------|-------|-------|-------|-----------------|
| Number of cells    | 740     | 630   | 386   | 203   | 171             |
| Number of patients | 43      | 36    | 21    | 12    | 8               |

**Supplementary Table 1:** Distribution of cell numbers and patient numbers in the group of control, CIN 1, CIN 2, CIN 3 and cervical cancer. 1959 cells from 112 patients were collected for mechanical characterization. Patients were diagnosed with different grades of cervical dysplasia on the basis of histopathology. MNSCs with flattened cell contours, a small nuclear-to-cytoplasmic ratio and larger cell volume were selected for mechanical analysis.

|                    | Young(<35 years) | Old(>35years) |
|--------------------|------------------|---------------|
| Number of cells    | 75               | 96            |
| Number of patients | 3                | 5             |

**Supplementary Table 2:** Distribution of cell numbers and patient numbers in the group of young patients and old patients with cervical cancer.

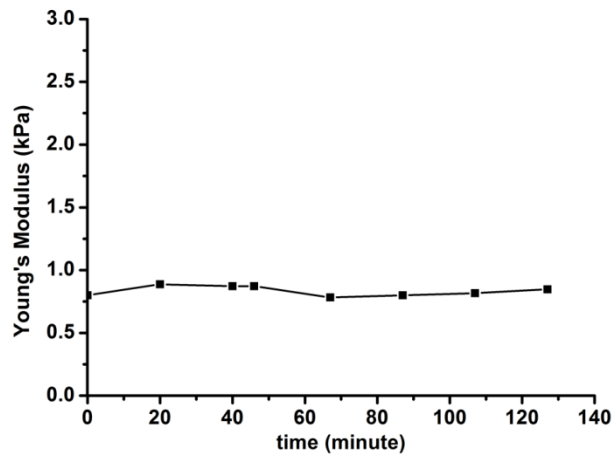

**Supplementary Figure 1:** Elasticity changes of morphologically normal cervical epithelial cells (MNSCs) as a function of time. Variation of Young's modulus was no more than 12% within 120 min, suggesting that mechanical properties of MNSCs were relatively stable during the experiment.

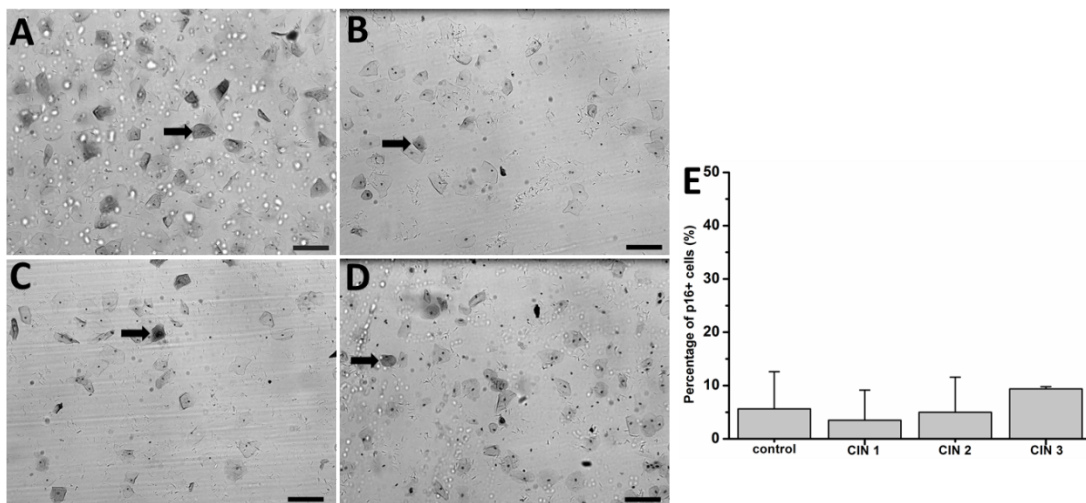

**Supplementary Figure 2:** Comparison of p16 expression in MNSCs from patients with endocervicitis, CIN 1, CIN 2 and CIN 3. A-D: p16 positive (p16+) MNSCs (black arrow) on smears made from patients with endocervicitis (A), CIN 1 (B), CIN 2 (C) and CIN 3 (D). Bar =100  $\mu$ m. E: Comparison of percentage of p16+ MNSCs in different groups. Percentage of p16+ MNSCs were calculated based on total number of MNSCs. Results showed that no obvious changes in p16 expression of MNSCs appeared in the four groups ( $F=0.47$ ,  $p=0.71$ ).

**A**

北京大学医学伦理委员会  
伦理审查批准书

批准号: IRB00001052-06058

|                                                                                                                                                                                                                                                                                                                                                                                           |         |                     |
|-------------------------------------------------------------------------------------------------------------------------------------------------------------------------------------------------------------------------------------------------------------------------------------------------------------------------------------------------------------------------------------------|---------|---------------------|
| 项目名称: CIN 及 HPV 感染的转归和宫颈癌发病机理的研究                                                                                                                                                                                                                                                                                                                                                          |         |                     |
| 项目负责人: 耿力                                                                                                                                                                                                                                                                                                                                                                                 | 职称: 研究员 | 联系电话: 62017691-2328 |
| 主要研究单位: 北京大学第三医院                                                                                                                                                                                                                                                                                                                                                                          |         |                     |
| 研究项目来源:<br><input checked="" type="checkbox"/> 政府 <input type="checkbox"/> 基金会 <input type="checkbox"/> 公司 <input type="checkbox"/> 国际合作 <input checked="" type="checkbox"/> 自主 <input type="checkbox"/> 其它                                                                                                                                                                               |         |                     |
| 研究经费资助者: 国家自然科学基金, 211 项目                                                                                                                                                                                                                                                                                                                                                                 |         |                     |
| <b>审查意见:</b><br>CIN 及 HPV 感染的转归和宫颈癌发病机理的研究的方案及知情同意书经伦理委员会审查:<br><input checked="" type="checkbox"/> 符合伦理学要求, 同意按照此方案进行试验。<br><input type="checkbox"/> 实验方案、 <input type="checkbox"/> 知情同意书 <input type="checkbox"/> 修改或 <input type="checkbox"/> 补充资料后, 伦理委员会同意开始试验。<br><input type="checkbox"/> 不符合伦理要求, 请修改后报伦理委员会再审查。<br><input type="checkbox"/> 终止 <input type="checkbox"/> 暂停已批准的试验 |         |                     |
| <br>北京大学医学伦理委员会<br>主任委员: 王恩光<br>2006 年 10 月 25 日                                                                                                                                                                                                                                                         |         |                     |

**B**

This is to certify that the study on "Prognosis of CIN & HPV Infection and Pathogenesis of Cervical Carcinoma" (with the Principal Investigator Li GENG and the study site the Third Affiliated Hospital of Peking University) was approved by Peking University Institutional Review Board on Oct 25, 2006. The COA Number is IRB00001052-06058.

  
 Peking University Institutional Review Board  
 2011-10-17

**Supplementary Figure 3:** Certification of the Ethics Committee of Peking University. A The original document in Chinese. B The certification in English.
